# Supplementary material for: Discovery of an orally active benzoxaborole prodrug effective in the treatment of Chagas disease in non-human primates
Source: PubMed Central journal article supplement (PMC9519446; doi:10.1038/s41564-022-01211-y), 2022-09-05

**Supplementary information**

---

**Discovery of an orally active benzoxaborole prodrug effective in the treatment of Chagas disease in non-human primates**

---

In the format provided by the authors and unedited

Supplementary Information for

**Discovery of an Orally Active Benzoxaborole prodrug effective in the Treatment of Chagas Disease in non-human primates**

Angel M. Padilla<sup>1†</sup>, Wei Wang<sup>1†</sup>, Tsutomu Akama<sup>2</sup>, David S. Carter<sup>2</sup>, Eric Easom<sup>2</sup>, Yvonne Freund<sup>2</sup>, Jason S. Halladay<sup>2</sup>, Yang Liu<sup>2</sup> Sarah A. Hamer<sup>3</sup>, Carolyn L. Hodo<sup>3</sup>, Gregory K. Wilkerson<sup>4</sup>, Dylan Orr<sup>1</sup>, Brooke White<sup>1</sup>, Arlene George<sup>1</sup>, Huifeng Shen<sup>1</sup>, Yiru Jin<sup>5</sup>, Michael Zhou Wang<sup>5</sup>, Susanna Tse<sup>6</sup>, Robert T. Jacobs<sup>2‡</sup>, Rick L. Tarleton<sup>1‡\*</sup>

Correspondence to: [tarleton@uga.edu](mailto:tarleton@uga.edu)

**This file includes:**

Supplemental Text  
Extended data legends  
Figs. S1 to S5  
Tables S1 to S8  
Captions for Data S1  
Source Data image for Fig. S1

**Other Supplementary Materials for this manuscript include the following:**

Data S1  
Hematology  
Blood Chemistry  
Weight  
Histology

## Supplementary Text

### Compound Synthesis

All compounds described in this paper were prepared as described in US Patent 10,882,272, granted January 5, 2021.

Summarized below are the syntheses of AN14353 and AN15368 that are representative of those described in this patent.

### Preparation of 1-hydroxy-7-methyl-1,3-dihydrobenzo[*c*][1,2]oxaborole-6-carboxylic acid 7.

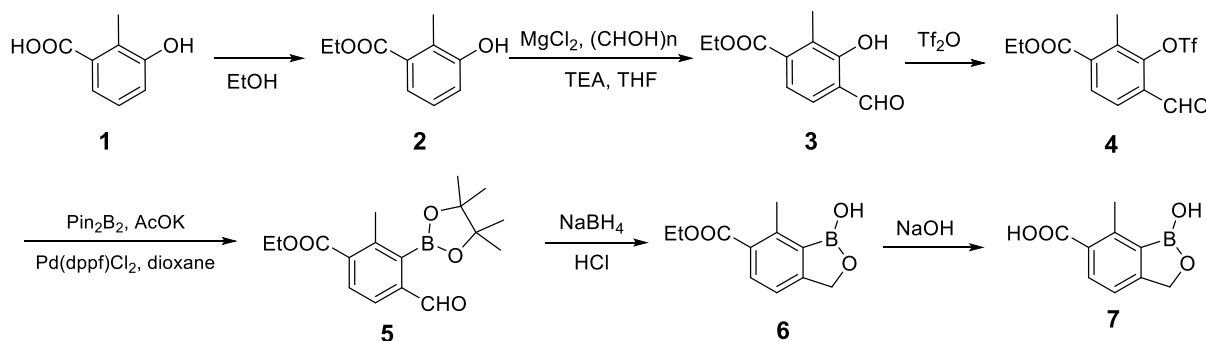

- a. **Ethyl 3-hydroxy-2-methylbenzoate 2.** To a solution of **1** (1.65 kg, 10.8 mol) in EtOH (6.50 L) was added con. H<sub>2</sub>SO<sub>4</sub> (326 g, 3.25 mol). The reaction mixture was heated 105 °C for 24 h. TLC showed **1** was consumed completely. The mixture was cooled to 15 °C and concentrated to give the crude product. The residue was poured into 2 M NaHCO<sub>3</sub> (aq., 3 L) and the solid was filtered. The filtrate was concentrated to give **2** (1.75 kg, 90%) as brown solid.

<sup>1</sup>H NMR (400 MHz, CDCl<sub>3</sub>) δ 7.41 (d, *J* = 7.9 Hz, 1H), 7.11 (t, *J* = 7.9 Hz, 1H), 6.94 (d, *J* = 7.9 Hz, 1H), 4.58 (br. s., 1H), 4.37 (q, *J* = 7.4 Hz, 2H), 2.46 (s, 3H), 1.40 (t, *J* = 7.1 Hz, 3H).

- b. **Ethyl 4-formyl-3-methylbenzoate 3.** To a solution of **2** (800 g, 4.44 mol) in THF (6.50 L) were added MgCl<sub>2</sub> (634 g, 6.66 mol, 273 mL), TEA (1.80 kg, 17.8 mol) and (HCHO)<sub>n</sub> (600 g, 6.66 mol). The mixture was immediately heated to 90 °C for 14 h. TLC showed the **2** was consumed completely. The reaction mixture was cooled to 15 °C, added ice H<sub>2</sub>O (3 L) and slowly added 12 M HCl (1.5 L). The mixture was stirred half an hour and then extracted with EtOAc (2 L). The combined organic layer was washed by sat. NaHCO<sub>3</sub> to neutral, dried over Na<sub>2</sub>SO<sub>4</sub>, filtered and concentrated under reduced

pressure to give **3** (880 g, crude) as brown oil.

<sup>1</sup>H NMR (400 MHz, CDCl<sub>3</sub>) δ 11.40 (s, 1H), 9.93 (s, 1H), 7.46 (d, *J* = 7.6 Hz, 1H), 7.37 (d, *J* = 8.0 Hz, 1H), 4.40 (q, *J* = 7.4 Hz, 2H), 2.44 (s, 3H), 1.41 (t, *J* = 7.1 Hz, 3H).

- c. **Ethyl 4-formyl-2-methyl-3-(((trifluoromethyl)sulfonyl)oxy)benzoate 4**. To a solution of **3** (900 g, 4.32 mol) in DCM (7.56 L) was added pyridine (1.02 kg, 12.9 mol) and DMAP (27 g, 221 mmol) respectively. The mixture was cooled to 0 °C and Tf<sub>2</sub>O (1.60 kg, 5.66 mol) was added drop wise. The reaction mixture was warmed to 15 °C and stirred for 1 h. TLC showed **3** was consumed completely. The mixture was quenched by water (7.65 L) and then extracted with DCM (7.65 L x 2). The combined organic layer was washed with water (2 L), dried over Na<sub>2</sub>SO<sub>4</sub>, filtered and concentrated under reduced pressure to give **4** (685 g, 47%) as a light yellow oil.

<sup>1</sup>H NMR (400 MHz, CDCl<sub>3</sub>) δ 10.27 (s, 1H), 7.99 (d, *J* = 8.0 Hz, 1H), 7.91-7.87 (m, 1H), 4.43 (q, *J* = 7.0 Hz, 2H), 2.64 (s, 3H), 1.43 (t, *J* = 7.3 Hz, 3H).

- d. **Ethyl 4-formyl-2-methyl-3-(4,4,5,5-tetramethyl-1,3,2-dioxaborolan-2-yl)benzoate 5**. To a solution of **4** (1.00 kg, 2.94 mol), bis(pinacolato)diboron (1.12 kg, 4.41 mol) and KOAc (573 g, 5.84 mol) in 1,4-dioxane (6.50 L) was added Pd(dppf)Cl<sub>2</sub>.CH<sub>2</sub>Cl<sub>2</sub> (150 g, 184 mmol). The mixture was heated at 85 °C for 15 h under N<sub>2</sub> atmosphere. TLC showed **4** was consumed completely. The mixture was cooled to 15 °C, filtered and concentrated to give the crude product. The residue was purified by column chromatography (SiO<sub>2</sub>, Petroleum ether/Ethyl acetate = 40/1 to 4:1) to give **5** (942 g, crude) as a yellow oil.

- e. **Ethyl 1-hydroxy-7-methyl-1,3-dihydrobenzo[c][1,2]oxaborole-6-carboxylate 6**. To a solution of **5** (1.20 kg, 3.77 mol) in MeOH (300 mL) and THF (6.00 L) was added NaBH<sub>4</sub> (80 g, 2.11 mol) in portions at 0 °C. Then the reaction mixture was stirred at 15 °C for 1 h. HPLC showed **5** was consumed completely. The reaction solution was adjusted to pH = 4 with 2 M HCl and then the organic layer removed in vacuo. The mixture was filtered. The cake was washed with Petroleum ether (5 L) and dried in vacuum to give **6** (665 g, 80%) as a white solid.

<sup>1</sup>H NMR (400 MHz, DMSO-*d*<sub>6</sub>) δ 9.18 (s, 1H), 7.89 (d, *J* = 8.0 Hz, 1H), 7.32 (d, *J* = 8.0 Hz, 1H), 5.00 (s, 2H), 4.30 (q, *J* = 7.0 Hz, 2H), 2.68 (s, 3H), 1.33 (t, *J* = 7.0 Hz, 3H).

- f. **1-Hydroxy-7-methyl-1,3-dihydrobenzo[c][1,2]oxaborole-6-carboxylic acid 7**. To a

mixture of **6** (867 g, 3.94 mol) in H<sub>2</sub>O (5.00 L) was added NaOH (394 g, 9.85 mol) in one portion. The solution was heated at 40 °C for 3 hours. HPLC showed **6** was consumed completely. This batch was work-up together with the other batches acidified with 2 M HCl to pH = 2. The solid was filtered and washed with H<sub>2</sub>O (10 L). The cake was dried to give **7** (2.00 kg, 87%) as a white solid.

<sup>1</sup>H NMR (400 MHz, DMSO-*d*<sub>6</sub>) δ 9.13 (br. s., 1H), 7.89 (d, *J* = 8.0 Hz, 1H), 7.28 (d, *J* = 8.0 Hz, 1H), 4.98 (s, 2H), 2.68 (s, 3H).

### Synthesis of 3,4-Difluorobenzyl(1-hydroxy-7-methyl-1,3-dihydrobenzo[*c*][1,2]oxaborole -6-carbonyl)-L-valinate (AN14353)

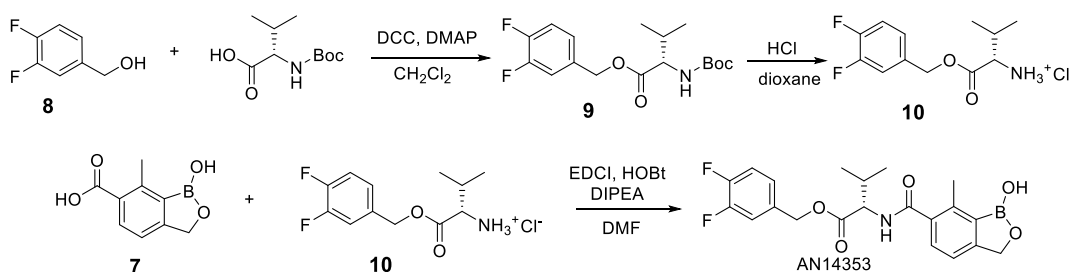

- 3,4-Difluorobenzyl (tert-butoxycarbonyl)-L-valinate 9.** To a solution of N-BOC-(S)-valine (2.6 g, 12.15 mmol, 1.00 eq) and 3,4-difluorobenzylalcohol (2.8 g, 19.44 mmol, 248.10 mL) in dry DCM (65 mL) was added DCC (4.45 g, 21.56 mmol, 838 mL) and DMAP (0.219 g, 1.797 mmol). The reaction mixture was stirred at 25°C for 18 h. The mixture was filtered and washed with DCM (100 mL) and concentrated to give the crude product. The residue was purified via column chromatography (SiO<sub>2</sub>, Petroleum ether/Ethyl acetate = 50/1 to 10:1) to give 3,4-difluorobenzyl (tert-butoxycarbonyl)-L-valinate **9** (3.7 g, 88% yield) as a yellow sticky solid.
- 3,4-Difluorobenzyl L-valinate hydrochloride 10.** To a stirred solution of **9** (5 g, 14.57 mmol) in dioxane (25 mL) was added 3N HCl/dioxane (25 mL). The reaction mixture was stirred at 25 °C for 18 h. The solvent was removed under reduced pressure and triturated with diethyl ether to give **10** (2.65 g, 63%) as a white solid.
- 3,4-Difluorobenzyl(1-hydroxy-7-methyl-1,3-dihydrobenzo[*c*][1,2]oxaborole -6-carbonyl)-L-valinate** A mixture of carboxylic acid **7** (0.7 g, 3.64 mmol), amine **10** (1.06 g, 4.37 mmol) and DIPEA (2.01 mL, 10.93 mmol) in DMF (20 mL) was added EDCI (1.04 g, 5.47 mmol) and HOBT (738 mg, 5.47). The mixture was stirred at RT for 18hrs. The crude product was purified by reversed phase chromatography to get AN14353 (350

mg, 23% yield) as a white solid. <sup>1</sup>H NMR (400 MHz, DMSO-d<sub>6</sub>) δ 9.02 (s, 1H), 8.58 (d, J = 7.94 Hz, 1H), 7.54 - 7.39 (m, 2H), 7.35 - 7.17 (m, 3H), 5.15 (s, 2H), 4.95 (s, 2H), 4.33 (t, J = 7.1 Hz, 1H), 2.41 (s, 3H), 2.20 - 2.08 (m, 1H), 0.94 (d, J = 6.6 Hz, 3H), 0.92 (d, J = 6.6 Hz, 3H); ESIMS m/z 418 [M+H]<sup>+</sup>; HPLC purity: 98.35% (220 nm), 98.15% (254 nm).

**Synthesis of (Tetrahydro-2H-pyran-4-yl)methyl (1-hydroxy-7-methyl-1,3-dihydrobenzo[c][1,2]oxaborole-6-carbonyl)-L-valinate (AN15368)**

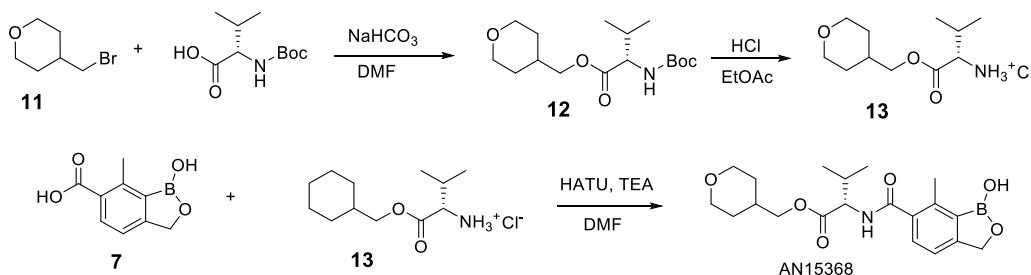

- a. **(Tetrahydro-2H-pyran-4-yl)methyl (tert-butoxycarbonyl)-L-valinate 12.** A mixture of (tert-butoxycarbonyl)-L-valine (3.64 g, 16.75 mmol), 4-(bromomethyl)tetrahydro-2H-pyran (3.00 g, 16.75 mmol) and NaHCO<sub>3</sub> (2.81 g, 33.50 mmol) in DMF (30 mL) was stirred at 70 °C for 12 hours under N<sub>2</sub> atmosphere. The reaction mixture was diluted with H<sub>2</sub>O (100 mL) and extracted with MTBE (50 mL x 2). The combined organic layers were washed with brine (20 mL x 2), dried over Na<sub>2</sub>SO<sub>4</sub>, filtered and concentrated under reduced pressure to give (tetrahydro-2H-pyran-4-yl)methyl (tert-butoxycarbonyl)-L-valinate (5 g, 95%) as a pale yellow oil) which was used into the next step without further purification. <sup>1</sup>H NMR (400 MHz, CDCl<sub>3</sub>) δ 5.01 (d, J = 8.4 Hz, 1H), 4.22 (dd, J = 8.8 Hz, 4.8 Hz, 1H), 4.00-3.97 (m, 4H), 3.40 (t, J = 11.2 Hz, 2H), 2.16-2.11 (m, 1H), 1.96-1.90 (m, 1H), 1.63 (d, J = 13.2 Hz, 2H), 1.45 (s, 9H), 0.97 (d, J = 6.4 Hz, 3H), 0.90 (d, J = 7.2 Hz, 3H).
- b. **(Tetrahydro-2H-pyran-4-yl)methyl L-valinate hydrochloride 13.** To a solution of (tetrahydro-2H-pyran-4-yl)methyl (tert-butoxycarbonyl)-L-valinate (5.00 g, 15.85 mmol) in EtOAc (50 mL) was added HCl/EtOAc (6 M, 26.42 mL). The mixture was stirred at 15 °C for 2 hours, then was concentrated under reduced pressure to give (tetrahydro-2H-pyran-4-yl)methyl L-valinate hydrochloride (3.80 g, yield 95%) as a white solid. <sup>1</sup>H NMR (400 MHz, DMSO-d<sub>6</sub>) δ 8.53 (br. s., 2H), 4.04 (d, J = 6.0 Hz, 2H), 3.88-3.84 (m, 3H), 3.29 (t, J = 11.2 Hz, 2H), 2.21-2.17 (m, 1H), 1.91-1.86 (m, 1H), 1.59 (d, J = 13.65

Hz, 2H), 1.29-1.34 (m, 2H), 0.97 (dd, J = 16.4, 7.2 Hz, 6H).

- c. A mixture of carboxylic acid **7** (2.00 g, 10.42 mmol), TEA (3.16 g, 31.26 mmol) and HATU (4.75 g, 12.50 mmol) in DMF (10 mL) was degassed and purged with N<sub>2</sub> for 3 times and stirred at 15°C for 10 mins. Amine **13** (2.75 g, 10.94 mmol) was added to the reaction mixture and stirred at 15 °C for 20 mins under N<sub>2</sub> atmosphere. After being filtered, the mixture was purified by prep-HPLC (column: Phenomenex Synergi Max-RP 250\*80 10u; liquid phase: [A-TFA/H<sub>2</sub>O = 0.075% v/v; B-ACN] B%: 10%- 40%, 20 mins]) to give (tetrahydro-2H-pyran-4-yl)methyl (1-hydroxy-7-methyl-1,3-dihydrobenzo[c][1,2]oxaborole-6-carbonyl)-L-valinate **AN15368** (1.300 g, 25%) as a white solid. <sup>1</sup>H NMR (400 MHz, DMSO-d<sub>6</sub>) δ 9.04 (br s, 1H), 8.54 (d, J = 7.6 Hz, 1 H), 7.37 (d, J = 7.6 Hz, 1H), 7.24 (d, J = 7.6 Hz, 1H), 4.97 (s, 2H), 4.31 (t, J = 7.0 Hz, 1H), 3.96 (d, J = 6.0 Hz, 2H), 3.85 (d, J = 9.2 Hz, 2H), 3.29 (t, J = 11.6 Hz, 2H), 2.47 (s, 3H), 2.14 (dd, J = 13.2, 6.4 Hz, 1H), 1.87 (br s, 1H), 1.59 (d, J = 12.0 Hz, 2H), 1.31-1.23 (m, 2H), 0.96 (d, J = 4.4 Hz, 6H); ESI-MS m/z 390 [M+H]<sup>+</sup>; HPLC purity: 98.49% (220 nm), 89.53% (254 nm).

## Figure legends – Extended data

**Extended data 1: Structure activity relationships of benzoxaboroles and their activity on different genetic types of *T. cruzi*.** **a.** Substitutions in the benzoxaborole ring C(7) position of AN10443 strongly affects in vitro activity against *T. cruzi*, with larger substitutions decreasing activity. **b.** *T. cruzi* of diverse genetic types (DTUs) are susceptible to AN14353-mediated killing (n=3 biological replicates for each profile determination)

**Extended data 2. Pre-, and post-treatment infection status of NHP.** Euth/Hem = hemoculture results of blood collected at time of euthanasia. LTF = lost to follow-up due to the animal's death from traumatic lesions it acquired through conspecific interactions.

**Extended data 3. Declining IgG levels to recombinant *T. cruzi* proteins over time in AN15368-treated NHP.** Luminex-based pre- and post-treatment IgG responses to recombinant *T. cruzi* proteins in AN15368-treated macaques not pictured in Fig. 4 (see Methods for identification of recombinant proteins).

**Extended data 4. AN15368 is activated by a *T. cruzi* serine carboxypeptidase and targets CPSF3.** **a.** Fold change in CPSF3 transcripts by qRT-PCR in two CPSF3-overexpressing *T. cruzi* lines (n=3 biological replicates). **b.** Overexpression of CPSF3 in *T. cruzi* results in increased resistance to all AN15368 analogues (CSPF3-OE: n=3 biological replicates; WT: n=2 biological replicates). **c.** AN15368 analogues require activation by the *T. cruzi* CBP in order to efficiently kill intracellular *T. cruzi* as demonstrated by the increased

resistance of CBP deficient parasites (TcCBP KO: n=3 biological replicates; WT: n=2 biological replicates). **d.** AN15368 analogues with poor activity against intracellular *T. cruzi* amastigotes have low nanomolar activity on extracellular amastigotes (n=3 biological replicates). Data are presented as mean values +/- SD.



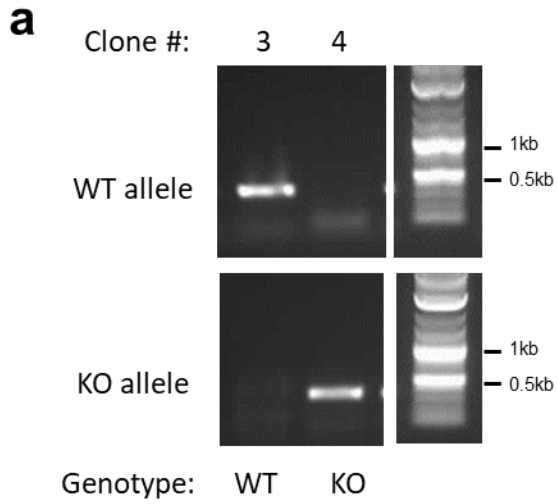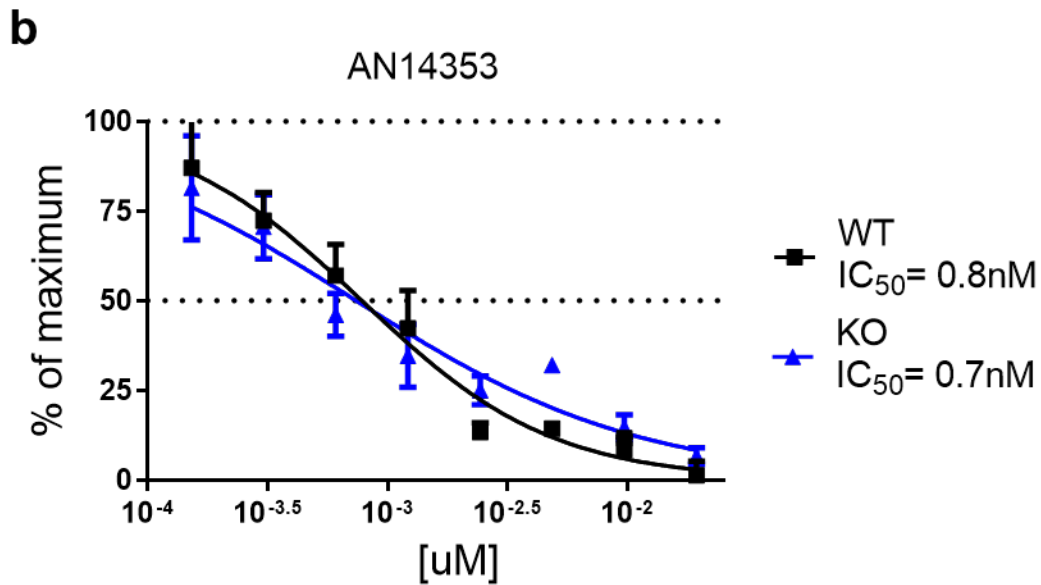

**Fig. S1.** Lack of impact of metalloprotease 2 (TcCLB.504045.60) disruption (a) on activity of AN14353 on intracellular amastigote (b). Representative microphotographs of assays repeated at least three times are shown. Data are presented as mean values  $\pm$  SEM;  $n=3$  biological replicates.

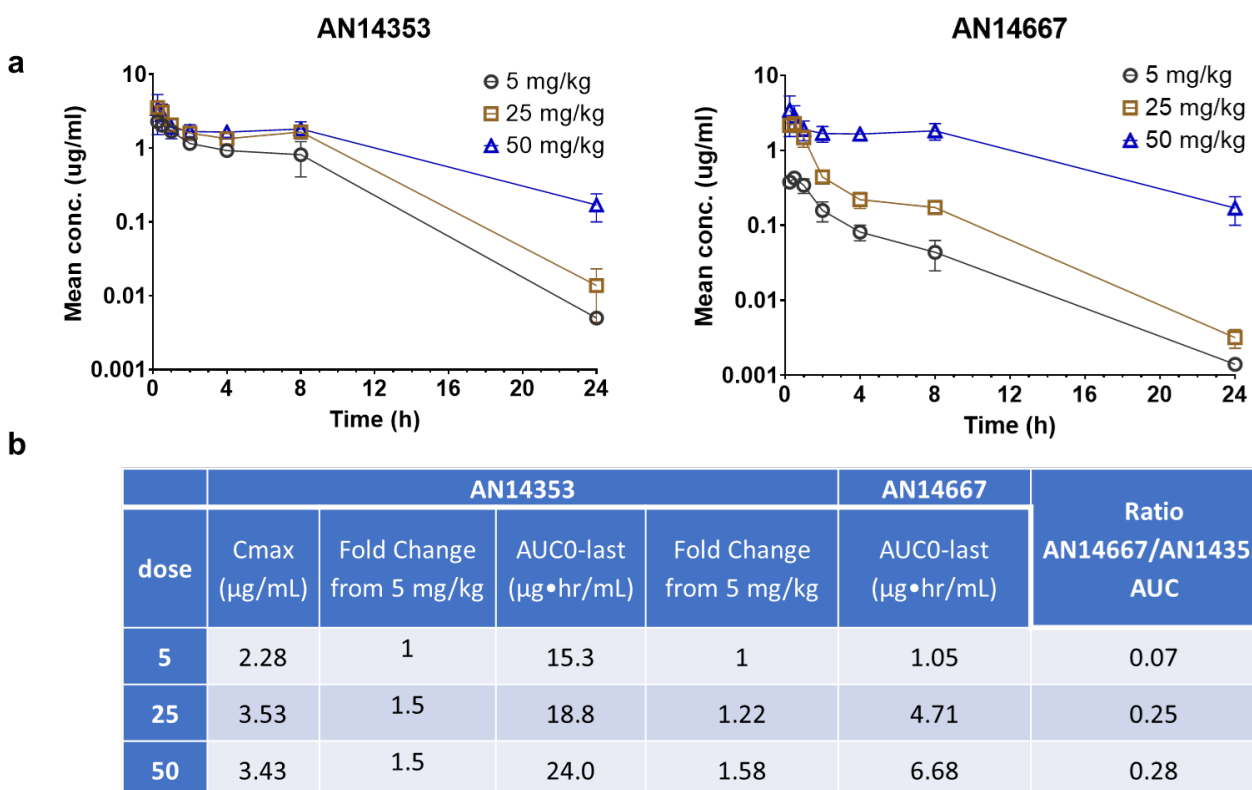

**Fig. S2.** Pharmacokinetics of AN14353 and its carboxylic acid product AN14667 in mice. **(a)** Time vs. concentration curves of substrate and product following oral administration of AN14353 (Data are presented as mean values  $\pm$  SEM;  $n=3$  animals), and **(b)** lack of dose proportionality of exposure with AN14353.

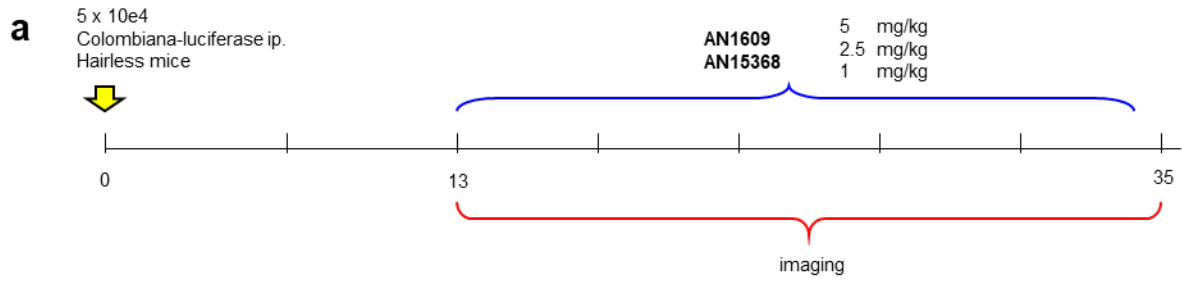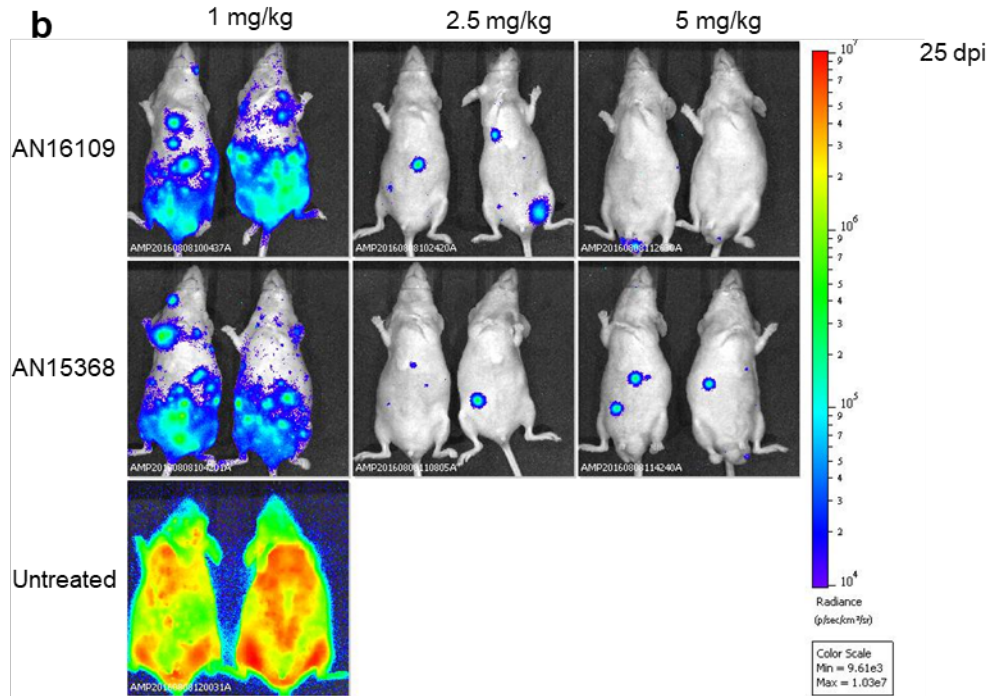

**Fig. S3. Short-term (non-cure) treatment course.** **a**, Experiment schedule for assessment of low dose treatment. On days 13-33 post infection, oral doses of AN15368 or AN16109 were administered at the indicated concentrations to hairless mice infected i.p. with  $5 \times 10^4$  Luciferase-expressing *T. cruzi*. **b**, Representative whole mouse images of bioluminescence signals acquired and quantified throughout the treatment by in vivo imaging. (n=4-7 mice).

**a**

| Rat IV (2 mg/kg)                 |            | Rat PO (10 mg/kg)                |             |
|----------------------------------|------------|----------------------------------|-------------|
| C <sub>max</sub> (µg/mL)         | 1.70 ± 0.2 | C <sub>max</sub> (µg/mL)         | 2.10 ± 0.29 |
| Cl (mL/h/kg)                     | 2258       | AUC <sub>0-last</sub> (hr*µg/mL) | 3.34        |
| V <sub>ss</sub> (mL/kg)          | 1115       | %F                               | 76.1        |
| AUC <sub>0-last</sub> (hr*µg/mL) | 0.883      |                                  |             |

**b**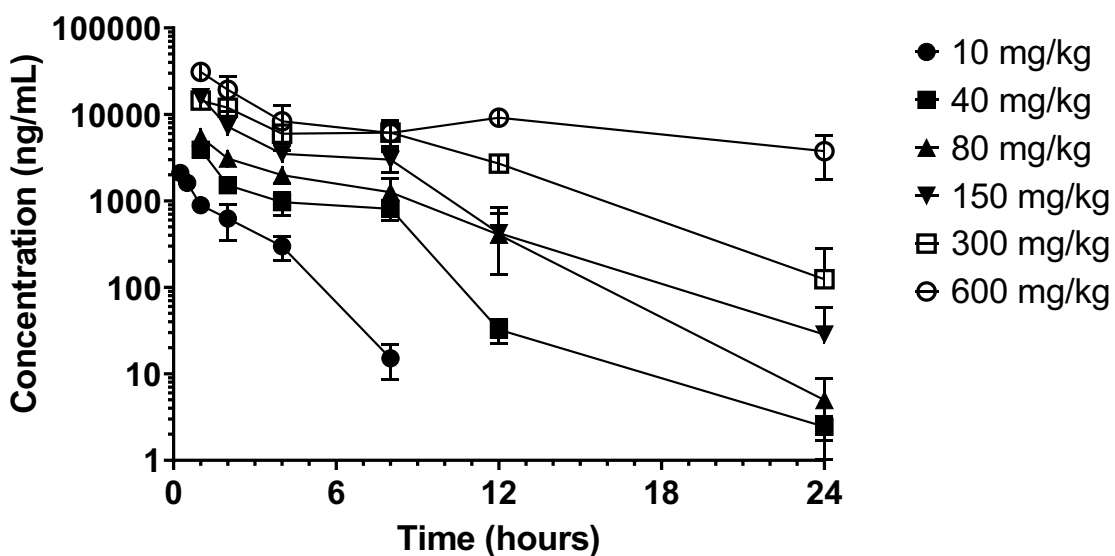

**Fig. S4. a**, Pharmacokinetics for AN15368 in rats and **b**, evidence for dose proportional exposure for AN15368 in rats. Data are presented as mean values +/- SEM; n= 3 animals.

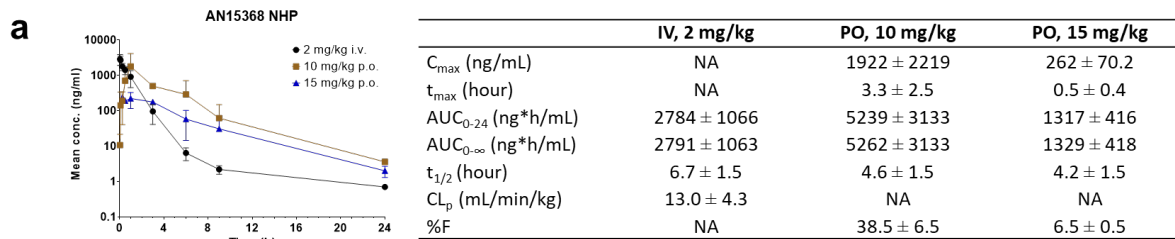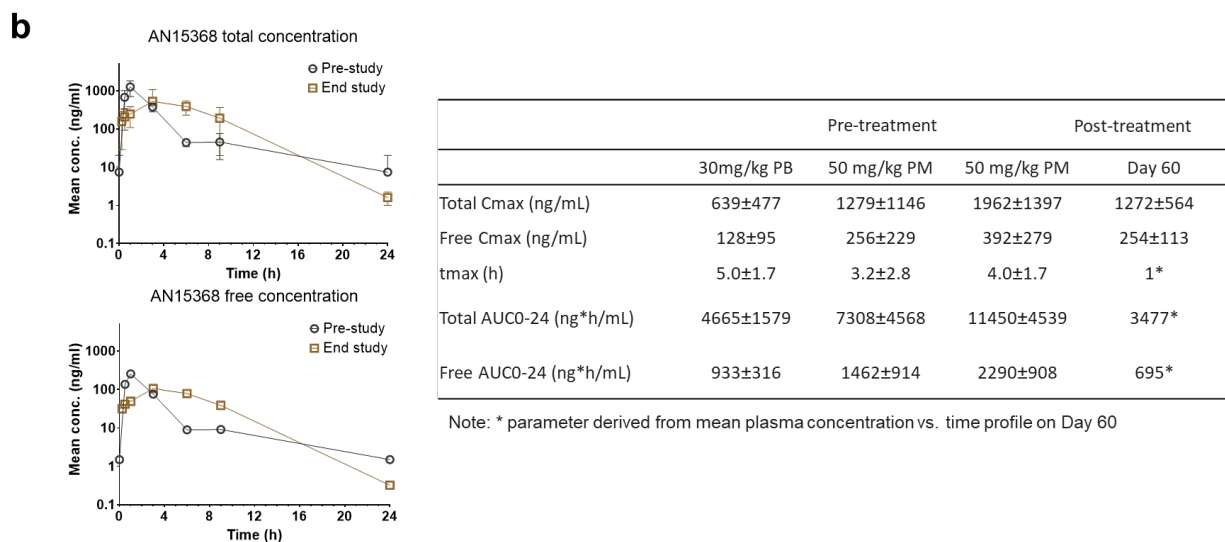

**Fig. S5. a.** Plasma concentrations and pharmacokinetics of AN15368 after a single IV (2 mg/kg) or oral (10 mg/kg in CMC/Tween; 15 mg/kg admixed in food) in rhesus macaques. **b.** Pharmacokinetics of AN15368 in rhesus macaques prior to beginning of daily dosing (pre-study) and on the 60<sup>th</sup> day of dosing (end study) after a single dose (Pre-treatment, Periods 1, 2 and 3) or multiple (Post-treatment, Day 60) oral administration of 30 mg/kg/day. Data are presented as mean values +/- SEM; n=3 animals for each period/treatment).

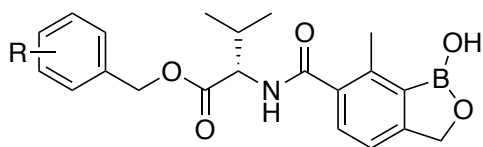

| AN #    | R                                              | <i>T. cruzi</i> IC50 (nM) | mouse S9 Clint (μL/min/mg) | cLogD | Solubility (pH 7.4 PBS, μM) |
|---------|------------------------------------------------|---------------------------|----------------------------|-------|-----------------------------|
| AN11735 | H                                              | 4.0                       | NT                         | 2.70  | 200                         |
| AN11736 | 4-F                                            | 0.9                       | 5.4                        | 2.90  | 35                          |
| AN14335 | 4-Cl                                           | 1.3                       | 16.6                       | 3.30  | 3.1                         |
| AN14336 | 4-CF <sub>3</sub>                              | 1.4                       | NT                         | 3.60  | 3.1                         |
| AN14353 | 3,4-F <sub>2</sub>                             | 6.0                       | 10.2                       | 3.00  | 25                          |
| AN14365 | 3-Cl                                           | 1.0                       | 17.1                       | 3.20  | 35                          |
| AN14393 | 4-CN                                           | 1.6                       | 7.6                        | 2.50  | 200                         |
| AN14416 | 3-CF <sub>3</sub>                              | 1.1                       | NT                         | 3.60  | 4.4                         |
| AN14429 | 3-CN                                           | 1.0                       | 9.1                        | 2.50  | 100                         |
| AN14500 | 3-CF <sub>3</sub> ,4-F                         | 0.7                       | 13.8                       | 3.70  | 50                          |
| AN14502 | 4-O(CH <sub>2</sub> ) <sub>2</sub> pyrrolidine | 16.0                      | 1.5                        | 2.60  | 400                         |
| AN14559 | 4-OCF <sub>3</sub>                             | 8.1                       | 10.6                       | 4.40  | 1.6                         |
| AN14560 | 3-OCF <sub>3</sub>                             | 0.7                       | 11.8                       | 4.40  | 1.6                         |
| AN14561 | 4-SO <sub>2</sub> CH <sub>3</sub>              | 126                       | 2.6                        | 1.50  | 283                         |

**Table S1.** SAR of Substituted Benzyl Esters in the C(7)-Methylbenzoxaborole Series. n = 3 biological replicates per dilution/determination.

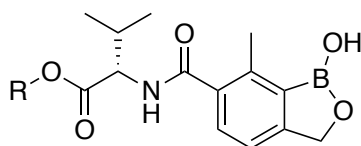

| AN #    | R                                                 | <i>T. cruzi</i><br>IC50<br>(nM) | mouse S9 Clint<br>( $\mu\text{L}/\text{min}/\text{mg}$ ) | cLogD | Solubility (pH<br>7.4 PBS, $\mu\text{M}$ ) |
|---------|---------------------------------------------------|---------------------------------|----------------------------------------------------------|-------|--------------------------------------------|
| AN14728 | Me                                                | 73                              | 1.0                                                      | 0.9   | 400                                        |
| AN15280 | iPr                                               | 12                              | 1.5                                                      | 1.7   | 400                                        |
| AN15300 | iBu                                               | 4                               | 3.8                                                      | 2.2   | 400                                        |
| AN15134 | tBu                                               | >1250                           | NT                                                       | 1.8   | 200                                        |
| AN15226 | -(CH <sub>2</sub> ) <sub>2</sub> OCH <sub>3</sub> | 19                              | 1.0                                                      | 0.8   | 400                                        |
| AN15129 | -(CH <sub>2</sub> ) <sub>2</sub> morpholinyl      | 121                             | 1.4                                                      | 0.6   | 400                                        |
| AN15143 | -(CH <sub>2</sub> ) <sub>2</sub> pyrrolidinyl     | 1193                            | NT                                                       | 1.1   | 283                                        |
| AN15144 | -(CH <sub>2</sub> ) <sub>2</sub> piperazinyl(NMe) | >1250                           | NT                                                       | 0.6   | 200                                        |
| AN15192 | 2-pyridylmethyl                                   | 10                              | 7.9                                                      | 1.6   | 400                                        |
| AN15078 | 3-pyridylmethyl                                   | 9                               | 5.2                                                      | 1.4   | 400                                        |
| AN15159 | 4-pyridylmethyl                                   | 30                              | 6.4                                                      | 1.4   | 400                                        |
| AN14504 | 6-CF <sub>3</sub> -3-pyridylmethyl                | 16                              | 3.5                                                      | 2.7   | 200                                        |
| AN15077 | pyrazinylmethyl                                   | 25                              | 1.6                                                      | 1.2   | 400                                        |
| AN15410 | 2-thiazolylmethyl                                 | 45                              | 1.4                                                      | 1.3   | 400                                        |
| AN15473 | 4-thiazolylmethyl                                 | 31                              | 1.5                                                      | 1.2   | 200                                        |
| AN15389 | 5-thiazolylmethyl                                 | 27                              | 1.8                                                      | 1.2   | 400                                        |
| AN15658 | 4-imidazolylmethyl                                | >1250                           | 6.5                                                      | 0.6   | NT                                         |
| AN15678 | 2-imidazolylmethyl                                | >1250                           | NT                                                       | 0.7   | NT                                         |

**Table S2.** SAR of Simple Aliphatic and Heterocyclic Esters in the C(7)-Methylbenzoxaborole Series. n = 3 biological replicates per dilution/determination. NT = not tested

| AN #    | in vitro metabolism                          |                                           | IV @ 2 mg/kg                |                                    |                             |                                     | PO @ 10 mg/kg               |                                     |     |
|---------|----------------------------------------------|-------------------------------------------|-----------------------------|------------------------------------|-----------------------------|-------------------------------------|-----------------------------|-------------------------------------|-----|
|         | Mouse S9<br>Cl <sub>int</sub><br>(μL/min/mg) | Human S9 Cl <sub>int</sub><br>(μL/min/mg) | C <sub>max</sub><br>(μg/mL) | Cl <sub>plasma</sub><br>(mL/hr/kg) | Vd <sub>ss</sub><br>(mL/kg) | AUC <sub>0-last</sub><br>(μg•hr/kg) | C <sub>max</sub><br>(μg/mL) | AUC <sub>0-last</sub><br>(μg•hr/kg) | %F  |
| AN11736 | 5.4                                          | NT                                        | 4.5                         | 138                                | 663                         | 14.2                                | NT                          | NT                                  | NT  |
| AN14353 | 10.2                                         | 17.8                                      | 2.6                         | 437                                | 706                         | 3.2                                 | 2.1                         | 12.8                                | 68  |
| AN14504 | 3.5                                          | 6.3                                       | 3.9                         | 437                                | 652                         | 5.0                                 | 2.9                         | 19.0                                | 75  |
| AN14557 | 18                                           | 23.8                                      | 3.1                         | 905                                | 750                         | 2.0                                 | 2.1                         | 10.0                                | 100 |
| AN15078 | 5.2                                          | 4.7                                       | NT                          | NT                                 | NT                          | NT                                  | 3.9                         | 9.6                                 | NC  |
| AN15129 | 1.4                                          | 2.5                                       | 5.2                         | 142                                | 305                         | 9.4                                 | 6.2                         | 16.4                                | 36  |
| AN15159 | 6.4                                          | 3.1                                       | NT                          | NT                                 | NT                          | NT                                  | 3.3                         | 5.8                                 | NC  |
| AN15192 | 7.9                                          | 15.8                                      | 3.6                         | 1048                               | 629                         | 1.9                                 | 2.9                         | 2.6                                 | 27  |
| AN15226 | 1.0                                          | 3.4                                       | NT                          | NT                                 | NT                          | NT                                  | 2.7                         | 8.4                                 | NC  |

**Table S3.** Pharmacokinetic Properties of Lead Compounds. n = 3 biological replicates per dilution/determination. NT = not tested; NC = not calculated.



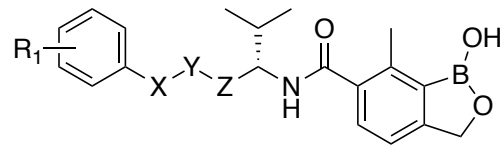

| AN #    | R1  | X-Y-Z                              | <i>T. cruzi</i> IC <sub>50</sub><br>(nM) |       |
|---------|-----|------------------------------------|------------------------------------------|-------|
| AN11735 | H   | CH <sub>2</sub> OCO                | ester                                    | 4     |
| AN15247 | H   | CH <sub>2</sub> NHCO               | amide                                    | >1250 |
| AN14973 | 4-F | CH <sub>2</sub> OCH <sub>2</sub>   | ether                                    | >1250 |
| AN15158 | H   | CH <sub>2</sub> CH <sub>2</sub> CO | ketone                                   | >1250 |
| AN15356 | H   | SO <sub>2</sub> NHCO               | acylsulfonamide                          | >1250 |
| AN14562 | 4-F | 1,2,4-oxadiazole                   | ester isostere                           | >1250 |

**Table S4.** Ester Replacements in the C(7)-Methylbenzoxaborole Series. n = 3 biological replicates per dilution for each determination.

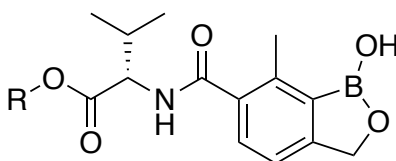

| AN #    | R                                                   | T. cruzi IC <sub>50</sub><br>(nM) | mouse S9 Clint<br>(μL/min/mg) | cLogD | Solubility<br>(pH 7.4 PBS, μM) |
|---------|-----------------------------------------------------|-----------------------------------|-------------------------------|-------|--------------------------------|
| AN15226 | -(CH <sub>2</sub> ) <sub>2</sub> OCH <sub>3</sub>   | 19                                | 1.0                           | 0.8   | 400                            |
| AN15368 | -CH <sub>2</sub> (4-tetrahydropyranyl)              | 5                                 | 1.0                           | 1.2   | 400                            |
| AN15572 | 4-tetrahydropyranyl                                 | 11                                | 1.0                           | 0.8   | 400                            |
| AN15573 | 3-oxetanyl                                          | 24                                | 1.0                           | 0.7   | 200                            |
| AN15664 | -CH(CH <sub>2</sub> OCH <sub>3</sub> ) <sub>2</sub> | 74                                | 1.0                           | 0.7   | NT                             |
| AN15666 | (S)-3-tetrahydrofuranyl                             | 90                                | 1.0                           | 0.7   | NT                             |
| AN15667 | (R)-3-tetrahydrofuranyl                             | 106                               | 1.0                           | 0.7   | NT                             |
| AN15828 | -CH <sub>2</sub> (3-oxetanyl)                       | 51                                | NT                            | 0.5   | NT                             |
| AN15876 | (R)-CH <sub>2</sub> (2-tetrahydrofuranyl)           | 7                                 | 16.5                          | 1.2   | NT                             |
| AN15953 | -CH <sub>2</sub> (4-F-tetrahydropyran-4-yl)         | 7                                 | 2.4                           | 0.7   | NT                             |
| AN15954 | -CH <sub>2</sub> (2-(1,4-dioxanyl)                  | 15                                | NT                            | 0.5   | NT                             |
| AN16108 | (S)-CH <sub>2</sub> (3-tetrahydrofuranyl)           | 3.5                               | NT                            | 0.9   | NT                             |
| AN16109 | (R)-CH <sub>2</sub> (3-tetrahydrofuranyl)           | 5.3                               | 2.4                           | 0.9   | NT                             |
| AN14817 | -CH <sub>2</sub> (4-fluorophenyl)                   | 12                                | 1.1                           | 1.4   | 50                             |
| AN15170 | -CH <sub>2</sub> (3,4-difluorophenyl)               | 19                                | 1.5                           | 1.5   | 100                            |
| AN15171 | -CH <sub>2</sub> (3,5-difluorophenyl)               | 21                                | 1.2                           | 1.5   | 100                            |
| AN15955 | -CH <sub>2</sub> (cyclopentyl)                      | 35                                | 3.4                           | 1.0   | NT                             |
| AN15988 | -CH <sub>2</sub> (2-pyridyl)                        | 92                                | NT                            | 0.1   | NT                             |
| AN16235 | -(CH <sub>2</sub> ) <sub>2</sub> morpholinyl        | >1250                             | NT                            | -0.9  | NT                             |
| AN16236 | (R)-CH <sub>2</sub> (2-tetrahydrofuranyl)           | 100                               | NT                            | -0.3  | NT                             |
| AN16330 | -CH <sub>2</sub> (4-tetrahydropyranyl)              | 302                               | NT                            | -0.3  | NT                             |

**Table S5.** SAR of Aliphatic and Cyclic Ether-Containing Esters and Hydroxyvaline Esters in the C(7)-Methylbenzoxaborole Series. n = 3 biological replicates per dilution/determination. NT = not tested.

| AN #    | in vitro metabolism                       |                                           | Plasma Protein Binding |                     | IV @ 2 mg/kg                |                                    |                             |                                     | PO @ 10 mg/kg               |                                     |    |
|---------|-------------------------------------------|-------------------------------------------|------------------------|---------------------|-----------------------------|------------------------------------|-----------------------------|-------------------------------------|-----------------------------|-------------------------------------|----|
|         | Mouse S9 Cl <sub>int</sub><br>(μL/min/mg) | Human S9 Cl <sub>int</sub><br>(μL/min/mg) | Mouse<br>(% @ 2 μM)    | Human<br>(% @ 2 μM) | C <sub>max</sub><br>(μg/mL) | Cl <sub>plasma</sub><br>(mL/hr/kg) | Vd <sub>ss</sub><br>(mL/kg) | AUC <sub>0-last</sub><br>(μg•hr/kg) | C <sub>max</sub><br>(μg/mL) | AUC <sub>0-last</sub><br>(μg•hr/kg) | %F |
| AN15226 | 1.0                                       | 3.4                                       | 98.7                   | NT                  | NT                          | NT                                 | NT                          | NT                                  | 2.69                        | 8.4                                 | NC |
| AN15368 | 1.0                                       | 1.5                                       | 97.8                   | 73.9                | 4.47                        | 246                                | 641                         | 8.13                                | 7.06                        | 17.5                                | 43 |
| AN15572 | 1.0                                       | 1.0                                       | 92.8                   | NT                  | NT                          | NT                                 | NT                          | NT                                  | 3.99                        | 15.9                                | NC |
| AN15876 | 3.3                                       | 16.5                                      | 97.3                   | 60.1                | NT                          | NT                                 | NT                          | NT                                  | 4.19                        | 4.3                                 | NC |
| AN16109 | 2.4                                       | 2.4                                       | 96.2                   | 68.9                | 4.68                        | 221                                | 454                         | 7.81                                | 6.80                        | 17.7                                | 49 |
| AN14817 | 1.1                                       | 1.4                                       | 97.3                   | 88.1                | 1.60                        | 947                                | 2079                        | 1.99                                | 1.41                        | 8.6                                 | 83 |
| AN16236 | NT                                        | NT                                        | NT                     | NT                  | 1.65                        | 1068                               | 1489                        | 1.86                                | 3.12                        | 8.4                                 | 90 |

**Table S6.** Pharmacokinetic Properties of Hydrophilic and Hydroxyvaline Esters. n = 3 biological replicates per dilution/determination.

| Animal ID      | Pre-Study |       | Days post-treatment |       |       |      |       |       |       |       |      |      |      |
|----------------|-----------|-------|---------------------|-------|-------|------|-------|-------|-------|-------|------|------|------|
|                | 1         | 2     | 0                   | 20    | 34    | 54   | 68    | 103   | 131   | 145   | 460  | 945  | 1281 |
| <b>Treated</b> |           |       |                     |       |       |      |       |       |       |       |      |      |      |
| T1             | 28.69     | 29.33 | NoCq                | NoCq  | NoCq  | NoCq | NoCq  | NoCq  | NoCq  | NoCq  | EUTH |      |      |
| T2             | 27.34     | 28.75 | NoCq                | NoCq  | NoCq  | NoCq | NoCq  | NoCq  | NoCq  | NoCq  | EUTH |      |      |
| T3             | 33.38     | NoCq  | NoCq                | NoCq  | NoCq  | NoCq | NoCq  | NoCq  | NoCq  | NoCq  | EUTH |      |      |
| T4             | 28.87     | 27.83 | NoCq                | NoCq  | NoCq  | NoCq | NoCq  | NoCq  | NoCq  | NoCq  | EUTH |      |      |
| T5             | 35.23     | 28.08 | NoCq                | NoCq  | NoCq  | NoCq | NoCq  | NoCq  | NoCq  | NoCq  | EUTH |      |      |
| T6             | 31.8      | 29.80 | NoCq                | NoCq  | NoCq  | NoCq | NoCq  | NoCq  | NoCq  | NoCq  | EUTH |      |      |
| T7             | 29.81     | 29.40 | NoCq                | NoCq  | NoCq  | NoCq | NoCq  | NoCq  | NoCq  | NoCq  | EUTH |      |      |
| T8             | 32.35     | 27.90 | NoCq                | NoCq  | NoCq  | NoCq | NoCq  | NoCq  | NoCq  | NoCq  | EUTH |      |      |
| T9             | 30.56     | 26.66 | NoCq                | NoCq  | NoCq  | NoCq | NoCq  | NoCq  | NoCq  | NoCq  | EUTH |      |      |
| T10            | 34.03     | 36.00 | NoCq                | NoCq  | NoCq  | NoCq | NoCq  | NoCq  | NoCq  | NoCq  | NoCq | NoCq | NoCq |
| T11            | 34.76     | 35.49 | NoCq                | NoCq  | NoCq  | NoCq | NoCq  | NoCq  | NoCq  | NoCq  | NoCq | NoCq | NoCq |
| T12            | 34.34     | 34.49 | NoCq                | NoCq  | NoCq  | NoCq | NoCq  | NoCq  | NoCq  | NoCq  | NoCq | NoCq | NoCq |
| T13            | 32.43     | NoCq  | NoCq                | NoCq  | NoCq  | NoCq | NoCq  | NoCq  | NoCq  | NoCq  | NoCq | NoCq | NoCq |
| T14            | NoCq*     | NoCq  | NoCq                | NoCq  | NoCq  | NoCq | NoCq  | NoCq  | NoCq  | NoCq  | NoCq | NoCq | NoCq |
| T15            | 38.44     | 36.41 | NoCq                | NoCq  | NoCq  | NoCq | NoCq  | NoCq  | NoCq  | NoCq  | NoCq | NoCq | NoCq |
| T16            | NoCq      | 29.52 | NoCq                | NoCq  | NoCq  | NoCq | NoCq  | NoCq  | NoCq  | NoCq  | NoCq | NoCq | NoCq |
| T17            | 31.67     | 32.35 | NoCq                | NoCq  | NoCq  | NoCq | NoCq  | NoCq  | NoCq  | NoCq  | LTF  |      |      |
| T18            | 28.49     | 27.01 | NoCq                | NoCq  | NoCq  | NoCq | NoCq  | NoCq  | NoCq  | NoCq  | NoCq | NoCq | NoCq |
| T19            | 34.25     | 30.32 | NoCq                | NoCq  | NoCq  | NoCq | NoCq  | NoCq  | NoCq  | NoCq  | NoCq | NoCq | NoCq |
| <b>Control</b> |           |       |                     |       |       |      |       |       |       |       |      |      |      |
| C1             | 25.89     |       | NoCq                | 40.35 | 34.56 | NoCq | 33.49 | 27.22 | ND    | EUTH  |      |      |      |
| C2             | 31.03     | 29.84 | NoCq                | NoCq  | NoCq  | NoCq | NoCq  | NoCq  | NoCq  | EUTH  |      |      |      |
| C3             | 33.29     | 38.45 | 31.71               | 41.55 | 39.61 | NoCq | NoCq  | 34.39 | 35.61 | 34.79 | ND   | ND   | ND   |

**Table S7.** Quantitation cycle (Cq) at which product is detected in DNA isolated from blood. EUTH indicates time of euthanasia. LTF = lost to follow-up. \*Note animal T14 was negative by PCR at the 2 pre-treatment sample points but was previously positive (Cq of 29.56 in Jan 2017 (8 months before treatment) and was hemoculture positive in pre-treatment bleed (see Table S8).

| Animal ID | Quad single | Quad pool | Heart single | Heart pool | Bicep single | Bicep pool | Sm intestine single | Lrg intestine single | Lrg intestine pool | Eso-phagus single | Eso-phagus pool | Tongue single | Tongue pool | Liver single | Liver pool | Fat single | Fat pool | Back muscle single | Back muscle pool | Brain single | Brain Pool | Spleen single | Total# tissue biopsies |
|-----------|-------------|-----------|--------------|------------|--------------|------------|---------------------|----------------------|--------------------|-------------------|-----------------|---------------|-------------|--------------|------------|------------|----------|--------------------|------------------|--------------|------------|---------------|------------------------|
| Treated   |             |           |              |            |              |            |                     |                      |                    |                   |                 |               |             |              |            |            |          |                    |                  |              |            |               |                        |
| T1        | 0/8         | 0/2       | 0/8          | 0/2        | 0/3          | 0/1        |                     | 0/3                  | 0/1                | 0/3               | 0/1             |               |             | 0/3          | 0/1        | 0/3        | 0/1      |                    |                  | 0/3          | 0/1        |               | 84                     |
| T2        | 0/8         | 0/2       | 0/8          | 0/2        | 0/3          | 0/1        |                     | 0/3                  | 0/1                | 0/3               | 0/1             |               |             | 0/3          | 0/1        | 0/3        | 0/1      |                    |                  | 0/3          | 0/1        |               | 84                     |
| T3        | 0/8         | 0/2       | 0/8          | 0/2        | 0/3          | 0/1        |                     | 0/3                  | 0/1                | 0/3               | 0/1             |               |             | 0/3          | 0/1        | 0/3        | 0/1      |                    |                  | 0/3          | 0/1        |               | 84                     |
| T4        | 0/8         | 0/2       | 0/13         | 0/2        | 0/8          | 0/1        |                     | 0/3                  | 0/1                | 0/3               | 0/1             |               |             | 0/3          | 0/1        | 0/8        | 0/1      |                    |                  | 0/3          | 0/1        |               | 99                     |
| T5        | 0/8         | 0/2       | 0/8          | 0/2        | 0/3          | 0/1        |                     | 0/3                  | 0/1                | 0/3               | 0/1             |               |             | 0/3          | 0/1        | 0/3        | 0/1      |                    |                  | 0/3          | 0/1        |               | 84                     |
| T6        | 0/8         | 0/2       | 0/8          | 0/2        | 0/3          | 0/1        |                     | 0/3                  | 0/1                | 0/3               | 0/1             |               |             | 0/3          | 0/1        | 0/3        | 0/1      |                    |                  | 0/3          | 0/1        |               | 84                     |
| T7        | 0/8         | 0/2       | 0/8          | 0/2        | 0/3          | 0/1        |                     | 0/3                  | 0/1                | 0/3               | 0/1             |               |             | 0/3          | 0/1        | 0/3        | 0/1      |                    |                  | 0/3          | 0/1        |               | 84                     |
| T8        | 0/8         | 0/2       | 0/8          | 0/2        | 0/3          | 0/1        |                     | 0/3                  | 0/1                | 0/3               | 0/1             |               |             | 0/3          | 0/1        | 0/3        | 0/1      |                    |                  | 0/3          | 0/1        |               | 84                     |
| T9        | 0/8         | 0/2       | 0/8          | 0/2        | 0/3          | 0/1        |                     | 0/3                  | 0/1                | 0/3               | 0/1             |               |             | 0/3          | 0/1        | 0/3        | 0/1      |                    |                  | 0/3          | 0/1        |               | 84                     |
| Control   |             |           |              |            |              |            |                     |                      |                    |                   |                 |               |             |              |            |            |          |                    |                  |              |            |               |                        |
| C1        | 2/14        | 2/2       | 2/9          | 0/1        | 5/11         | 2/2        | 0/2                 | 0/4                  | 1/1                | 3/3               |                 |               |             | 2/3          | 0/1        | 1/5        | 0/1      | 0/4                | 0/1              |              |            | 0/4           | 104                    |
| C2        | 0/14        | 0/8       | 0/13         | 0/7        | 0/9          | 0/6        | 0/5                 | 0/11                 | 0/3                | 0/10              | 0/1             | 0/10          | 0/1         | 0/10         | 0/1        | 0/10       | 0/1      |                    |                  | 0/9          | 0/2        | 0/3           | 254                    |

**Table S8.** Detection of parasite DNA in tissue samples from treated and control (not treated) macaques. DNA isolated from individual specimens or pools of 5 specimens from different locations in the tissue/organ were screened by PCR for detection of *T. cruzi* DNA. Data indicate number of PCR+ samples/number of samples tested. Back muscle is the latissimus dorsi. Total specimens = the sum of individual and pooled specimens screened.

**Data S1. (separate file). Pre-, during- and post-treatment clinical data for NHP.**

Source Data image for S1a

Clone #: 3 4

WT allele

KO allele

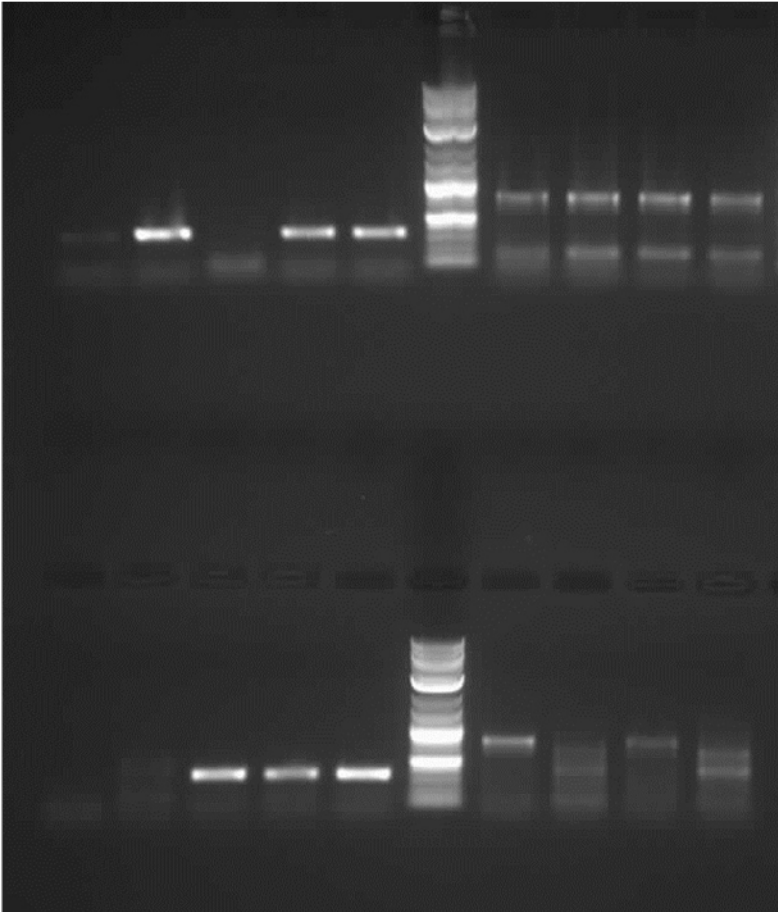

Supplement: 41564_2022_1211_MOESM1_ESM.pdf [file 41564_2022_1211_MOESM1_ESM.pdf]
