# Supplementary material for: Discovery of an orally active benzoxaborole prodrug effective in the treatment of Chagas disease in non-human primates
Source: PubMed Central journal article supplement (PMC9519446; doi:10.1038/s41564-022-01211-y), 2022-09-05

Image source data\_Figure 2b. Left panel

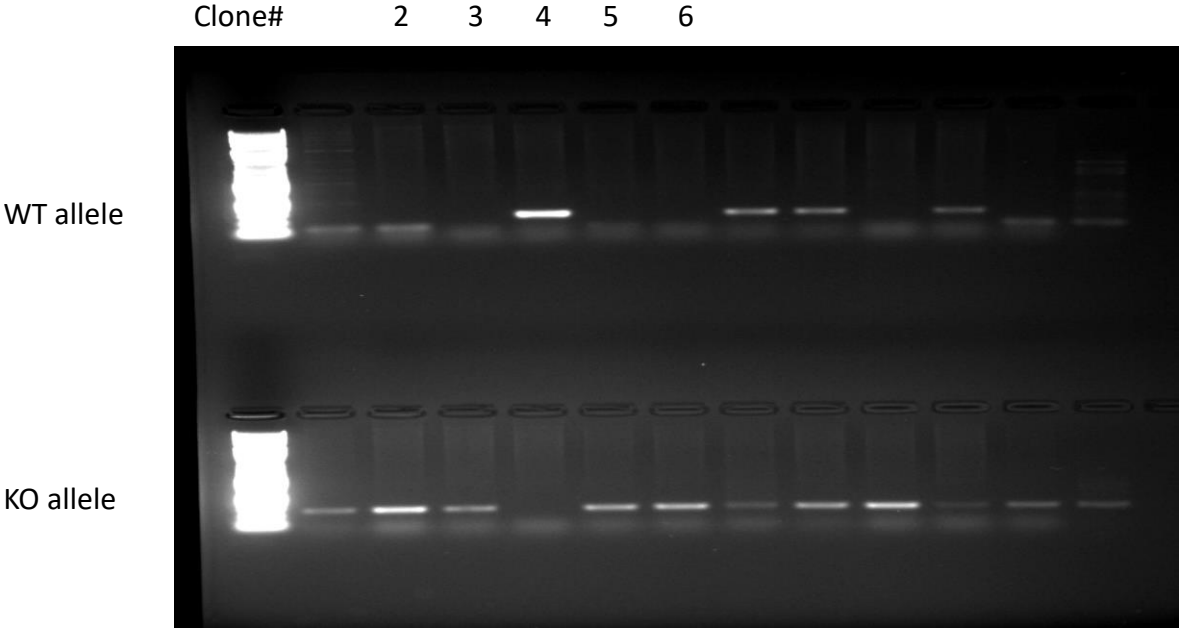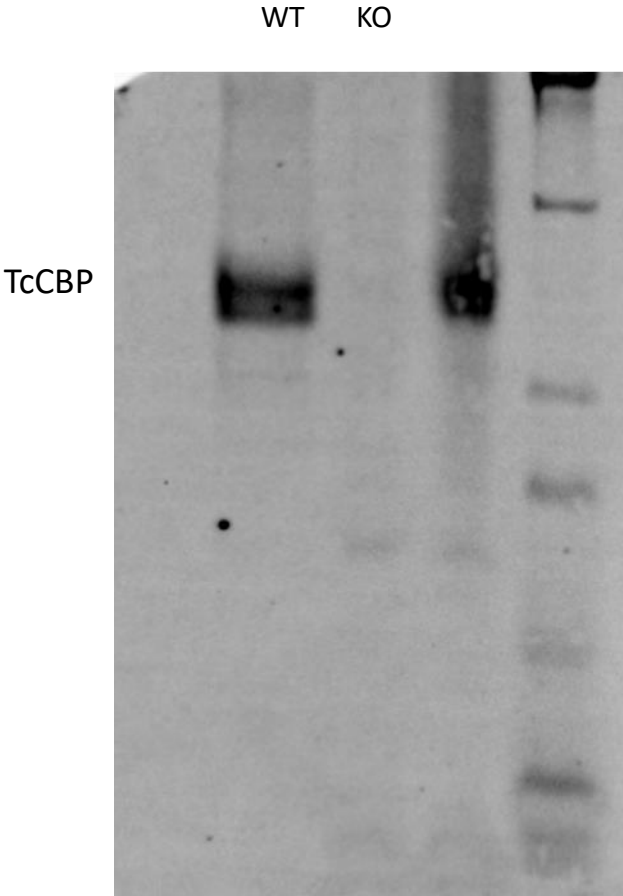

Image source data\_Figure 2b. right panel

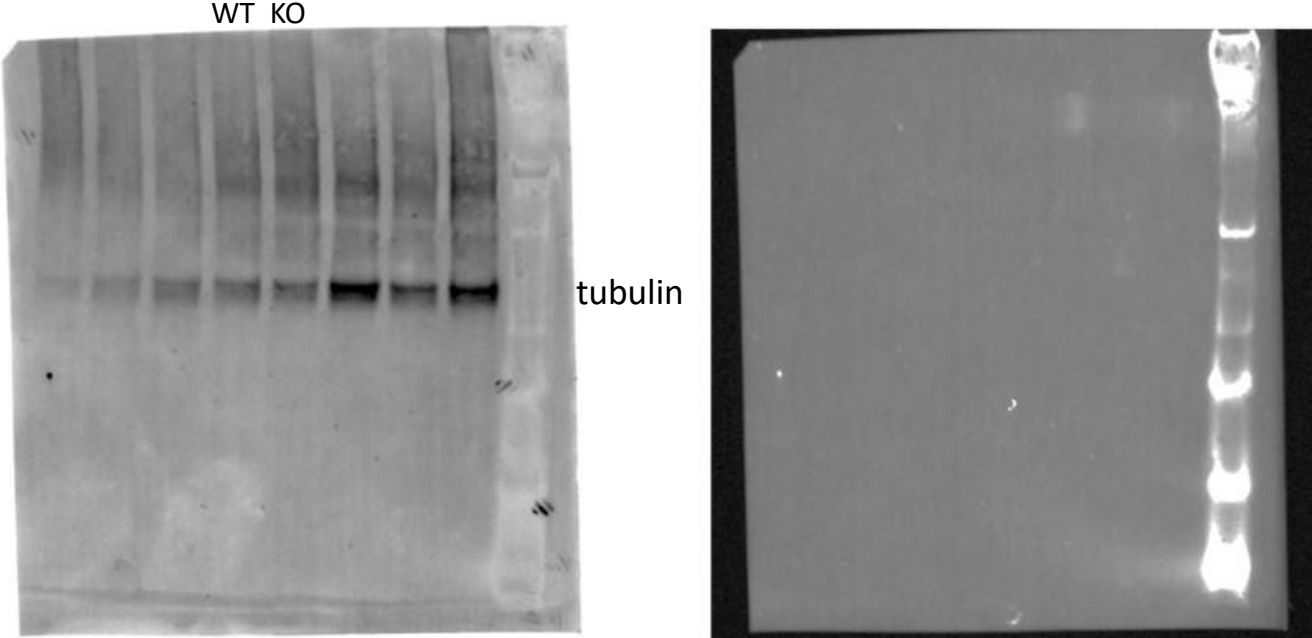

Supplement: 41564_2022_1211_MOESM10_ESM.pdf [file 41564_2022_1211_MOESM10_ESM.pdf]
